# Supplementary material for: The Beneficial Effects of Eccentric Exercise in the Management of Lateral Elbow Tendinopathy: A Systematic Review and Meta-Analysis
Source: MDPI journal article supplement (doi:10.3390/jcm10173968), 2021-09-01
Supplement: s1 [file s1]

## Supplementary material

### Appendix 1. Search strategies

#### PubMed

| Recent queries in pubmed |                                                                                                   |             |
|--------------------------|---------------------------------------------------------------------------------------------------|-------------|
| Search                   | Query                                                                                             | Items found |
| #8                       | #4 AND #7                                                                                         | 331         |
| #7                       | #5 OR #6                                                                                          | 438307      |
| #6                       | Search exercise[MeSH Terms]                                                                       | 210808      |
| #5                       | Search "eccentric exercise" OR eccentric OR exercise OR strengthening                             | 325467      |
| #4                       | #1 OR #2 OR #3                                                                                    | 5782        |
| #3                       | Search tennis elbow[MeSH Terms]                                                                   | 1728        |
| #2                       | Search elbow tendinopathy[MeSH Terms]                                                             | 1758        |
| #1                       | Search ("lateral epicondylitis" OR "elbow pain" OR “tennis elbow” OR epicondyl* OR “elbow tend*”) | 5536        |

#### EMBASE

| No. | Query                                                                                                                                                                                          | Results |
|-----|------------------------------------------------------------------------------------------------------------------------------------------------------------------------------------------------|---------|
| #3  | #1 AND #2                                                                                                                                                                                      | 417     |
| #2  | strengthening exercise'/exp OR 'eccentric exercise'/exp OR 'eccentric exercise':ab,ti OR eccentric:ab,ti OR exercise:ab,ti OR strengthening:ab,ti                                              | 423877  |
| #1  | lateral epicondylitis'/exp OR 'elbow pain'/exp OR 'tennis elbow'/exp OR 'lateral epicondylitis':ab,ti OR 'elbow pain':ab,ti OR 'tennis elbow':ab,ti OR epicondyl*:ab,ti OR 'elbow tend*':ab,ti | 7788    |

#### Cochrane Central Register of Controlled Trials (CENTRAL)

- #1 "lateral epicondylitis" OR "elbow pain" OR “tennis elbow” OR epicondyl\* OR “elbow tend\*” 1320
- #2 MeSH descriptor: [Tennis Elbow] explode all trees 400
- #3 MeSH descriptor: [Elbow Tendinopathy] explode all trees 404
- #4 #1 OR #2 OR #3 1321
- #5 "eccentric exercise" OR eccentric OR exercise OR strengthening 109388

|    |                                               |        |
|----|-----------------------------------------------|--------|
| #6 | MeSH descriptor: [Exercise] explode all trees | 25628  |
| #7 | #5 OR #6                                      | 112453 |
| #8 | #4 AND #7                                     | 276    |
